# Supplementary material for: The Metabolically Obese, Normal-Weight Phenotype in Young Rats Is Associated with Cognitive Impairment and Partially Preventable with Leptin Intake during Lactation
Source: MDPI journal article supplement (doi:10.3390/ijms25010228), 2023-12-22
Supplement: s1 [file s1]

**Table S1.** Nucleotide sequences of primers used for real-time RT-qPCR amplification of cognitive impairment-related genes.

| Gene           | Forward primer (5'-3') | Reverse primer (3'-5') | Amplicon size (bp) |
|----------------|------------------------|------------------------|--------------------|
| <i>App</i>     | CTGCTGACCGAGGACTGAC    | CCGAACTCCGCATCCATCTT   | 94                 |
| <i>Bdnf</i>    | ATTAGCGAGTGGGTACAGC    | CGAGTTCCAGTGCCTTTTGT   | 189                |
| <i>Casp3</i>   | ACCCTGAAATGGGCTTGTGT   | ACAGGTCCGTTTCGTTCCAAA  | 280                |
| <i>Naa16</i>   | AGTGCTACCGAAATGCCCTCA  | TGTGTCGGGCGTAACTGAAGA  | 139                |
| <i>Psen1</i>   | TGGTGTGGTCGGGATGATTG   | CGACCAGCATACGAAGTGGA   | 203                |
| <i>Psen2</i>   | CCTGGCGGTGATGGAATACA   | AGCGCTTCCCACAGTATGAC   | 292                |
| <i>Sor11</i>   | CACCGTCTCATTGTCAGCAC   | ATCTCGTAGCCCCTGGTTTC   | 123                |
| <i>Syn1</i>    | GCAGTTTGGTCATTGGGCTG   | ACAGGGTATGTTGTGCTGCT   | 202                |
| <i>Tmcc2</i>   | TCCTCCTCTACCACCGATAACC | CTCCCTTGTACCCCTTGTCC   | 103                |
| <i>Trkb</i>    | TCGGTATCACCAACAGCCAG   | GCTCGGGGCAGAGGTTATAG   | 141                |
| <i>Zpr1</i>    | GGATTACCCTCCACATCACAG  | TGTCTTTCAGCAGTCCTTCG   | 153                |
| Reference gene |                        |                        |                    |
| <i>Gdi</i>     | CCGCACAAGGCAAATACATC   | GACTCTCTGAACCGTCATCAA  | 159                |

Abbreviations: *App*, amyloid precursor protein; *Bdnf*, brain derived neurotrophic factor; *Casp3*, caspase 3; *Naa16*, N(alpha)-acetyltransferase 16, NatA auxiliary subunit; *Psen1*, presenilin 1; *Psen2*, presenilin 2; *Sor11*, sortilin related receptor 1; *Syn1*, Synapsin I; *Tmcc2*, transmembrane and coiled-coil domain family 2; *Trkb*, neurotrophic receptor tyrosine kinase 2; *Zpr1*, zinc finger protein 259.
